1 **Multi-lab EcoFAB study shows highly reproducible physiology and depletion of soil**  
2 **metabolites by a model grass**

3

4 Joelle Sasse<sup>1,2</sup>, Josefine Kant<sup>3</sup>, Benjamin J. Cole<sup>1,2</sup>, Andrew P. Klein<sup>4</sup>, Borjana Arsova<sup>3</sup>, Pascal  
5 Schlaepfer<sup>5</sup>, Jian Gao<sup>1,2</sup>, Kyle Lewald<sup>1,2</sup>, Kateryna Zhalnina<sup>1,2</sup>, Suzanne Kosina<sup>1,2</sup>, Benjamin P.  
6 Bowen<sup>1,2</sup>, Daniel Treen<sup>1,2</sup>, John Vogel<sup>1,2</sup>, Axel Visel<sup>1,2,6</sup>, Michelle Watt<sup>3</sup>, Jeffery L. Dangl<sup>4</sup> & Trent R.  
7 Northen<sup>1,2</sup>

8

9 <sup>1</sup>Lawrence Berkeley National Laboratory, 1 Cyclotron Rd, Berkeley, CA 94720, USA; <sup>2</sup>Joint  
10 Genome Institute, 2800 Mitchell Dr, Walnut Creek, CA 94598, USA; <sup>3</sup>Institut für Bio-&  
11 Geowissenschaften, Forschungszentrum Jülich, Wilhelm-Johnen-Straße, 52428 Jülich, Germany;  
12 <sup>4</sup>Howard Hughes Medical Institute and Dept. of Biology, University of North Carolina Chapel Hill,  
13 250 Bell Tower Drive, Chapel Hill, NC 27599, USA; <sup>5</sup>Institute of Molecular Plant Biology, ETH  
14 Zürich, Universitätsstrasse 2, 8092 Zürich, Switzerland, <sup>6</sup>School of Natural Sciences, University  
15 of California, Merced, CA 95343, USA

16

17

## 18 **Summary**

- 19 • There is a dynamic reciprocity between plants and their environment: On one hand, the  
20 physiochemical properties of soil influence plant morphology and metabolism, while on  
21 the other, root morphology and exudates shape the environment surrounding roots. Here,  
22 we investigate both of these aspects as well as the reproducibility of these responses  
23 across laboratories.
- 24 • The model grass *Brachypodium distachyon* was grown in phosphate-sufficient and  
25 phosphate-deficient mineral media, as well as in sterile soil extract, within fabricated  
26 ecosystem (EcoFAB) devices across four laboratories.
- 27 • Tissue weight and phosphate content, total root length, root tissue and exudate metabolic  
28 profiles were found to be consistent across laboratories and distinct between  
29 experimental treatments. Plants grown in soil extract were morphologically and  
30 metabolically distinct in all laboratories, with root hairs four times longer compared to  
31 other growth conditions. Further, plants depleted half of the investigated metabolites  
32 from the soil extract.
- 33 • To interact with their environment, plants not only adapt morphology and release  
34 complex metabolite mixtures; they also selectively deplete a range of soil-derived  
35 metabolites. The EcoFABs utilized here generated high inter-laboratory reproducibility,  
36 demonstrating that their value in standardized investigations of plant traits.

## 37 **Keywords**

- 38 1. *Brachypodium distachyon*
- 39 2. Metabolomics
- 40 3. Model ecosystem
- 41 4. Reproducibility study
- 42 5. Rhizosphere processes
- 43 6. Root exudates
- 44 7. Root morphology
- 45 8. Soil extract

## 46 Introduction

47 Plants adapt to their belowground environment by root morphological and metabolic  
48 plasticity. In turn, they influence soil physiochemical properties and root-associated organisms  
49 by creating the rhizosphere, an environmental niche formed by the physical structure of roots  
50 and the release of metabolites (root exudates). These complex root – environment interactions  
51 are challenging to study in general, and even more so in a manner that is reproducible across  
52 laboratories (Poorter *et al.*, 2012).

53 Root morphology and metabolism are affected by abiotic and biotic factors. Nutrient  
54 availability of soils for example can profoundly affect root morphology, and provoke changes in  
55 root metabolism. Phosphate limitation typically results in elongated lateral roots and root hairs  
56 in a context-dependent manner (Plaxton & Tran, 2011; Peret *et al.*, 2011; Nestler *et al.*, 2016),  
57 and increased exudation of organic acids that solubilize phosphate (Neumann & Martinoia, 2002;  
58 Plaxton & Tran, 2011; Thijs *et al.*, 2016). Root morphology and metabolism is further affected by  
59 microbes and microbial compounds (Venturi & Keel, 2016; Verbon & Liberman, 2016; Etalo *et al.*  
60 *et al.*, 2018). The presence of plant growth-promoting bacteria can stimulate lateral root and root  
61 hair growth of *Arabidopsis* (López-Bucio *et al.*, 2007; Zamioudis *et al.*, 2013; Vacheron *et al.*,  
62 2013). Plant responses to abiotic and biotic factors are likely intertwined, as illustrated recently  
63 by a study that linked phosphate stress in plants with the structure of root-associated microbial  
64 communities (Castrillo *et al.*, 2017). Thus, plant phenotypes in soil are a result of a complex  
65 response to abiotic and biotic factors, and an integrated view of root morphology and  
66 metabolism is necessary to gain a holistic understanding of plant – environment interactions.

67 Characterization of plant phenotypes in response to abiotic and biotic stresses in soil can  
68 have profound impact on agriculture, especially as many resources, such as phosphate-based  
69 fertilizers are limited (Cordell *et al.*, 2009), and global food demand is projected to have to  
70 increase by 60% by the year 2050 due to an ever-growing population (FAO. World food  
71 situation.)( ). Grasses are central to biofuel production and provide 70% of human calories  
72 (Brutnell *et al.*, 2015). Thus, research on model grasses such as *Setaria viridis* and *Brachypodium*  
73 *distachyon* can inform growth strategies for many crops (Brutnell *et al.*, 2015). *B. distachyon* is  
74 gaining popularity as a model grass because of its small genome, short generation time, genetic  
75 tractability, and the availability of extensive germplasm and mutant collections (Hsia *et al.*,

76 2017). Additionally, since it uses C<sub>3</sub> carbon fixation, it is a good laboratory model plant relevant  
77 to cereal crops such as barley, rice, and wheat. It has recently been utilized to investigate plant  
78 developmental processes, abiotic stresses, biotic interactions, and root morphology (Watt *et al.*,  
79 2009; Brutnell *et al.*, 2015).

80 The relationship between plants and their environment is ideally studied in an  
81 agriculturally relevant field setting. Environmental factors, especially the type of soil in which  
82 plants are grown, are major determinants of root-associated microbial communities (Bulgarelli  
83 *et al.*, 2013; Edwards *et al.*, 2015), and of root morphology (Senga *et al.*, 2017). However,  
84 investigation of root morphology in soil is challenging due to its opacity, while investigation of  
85 exudation in soil is challenging due to its physiochemical complexity (Cai *et al.*, 2011).  
86 Specialized imaging techniques such as magnetic resonance imaging, computed tomography  
87 (Metzner *et al.*, 2015; Helliwell *et al.*, 2017), or the use of labeled plants (Rellán-Álvarez *et al.*,  
88 2015) have been developed, but are not widely accessible or amenable to high throughput  
89 experimentation (Metzner *et al.*, 2015). Similarly, approaches for the investigation of root  
90 exudation in soils include the use of *in-situ* soil drainage systems (lysimeters) in fields (Strobel,  
91 2001), which are low throughput and require complex installations, or of laboratory-based  
92 extraction methods that are based on flushing the soil with large volumes of liquids (Swenson *et al.*  
93 *et al.*, 2015; Pétriacq *et al.*, 2017). Studying metabolites within rhizosphere soils is also challenging  
94 because of the complex mixture of plant- and microbe-derived metabolites, which are potentially  
95 altered by the chemistry and mineralogy of the soil investigated. A further challenge is the  
96 limited reproducibility of morphological and metabolic data generated (Massonnet *et al.*, 2010;  
97 Poorter *et al.*, 2012).

98 Due to these challenges in the field, root morphology and metabolism are often studied in  
99 laboratory settings. Laboratory environments can feature transparent substrates and mineral  
100 growth media devoid of complex chemical compounds present in soils, in order to allow  
101 straightforward investigation of plant traits. However, these highly artificial laboratory  
102 environments may not reproduce normal plant growth and plant-environment interactions that  
103 occur in the field. Thus, systems that allow the manipulation of aspects of natural systems in a  
104 controlled laboratory environment are desirable. Microfluidic devices are gradually improved to  
105 study for example heterogenous environments (Stanley *et al.*, 2017), and currently, these

106 important devices are designed to accommodate plants with small roots such *Arabidopsis* for a  
107 growth period of several days to about two weeks (Parashar & Pandey, 2011; Jiang *et al.*, 2014;  
108 Stanley *et al.*, 2017). We recently reported on a modular growth system, the EcoFAB (Ecosystem  
109 Fabrication), which facilitates the evaluation of root morphology and exudation of various plants  
110 over the course of several plant developmental stages up to several weeks (Gao *et al.*, 2018). The  
111 EcoFAB design is purposely kept simple and inexpensive, to allow for straightforward design and  
112 manufacturing of EcoFABs for various experimental questions. The EcoFABs also address the  
113 challenge of studying plant growth in various environments, such as chemically simple or  
114 complex hydroponic setups, including the ability to add solid substrates such as sand or soil. In  
115 addition, microbes can be added to EcoFAB chambers, and the system is compatible with  
116 chemical imaging (Gao *et al.*, 2018). One of the key distinctions of a standardized system such as  
117 the EcoFAB is the reproducibility of data generated.

118 The study presented here aimed to test the reproducibility of EcoFABs across multiple  
119 laboratories in assessing the response of the model grass *B. distachyon* in different growth  
120 media. Phosphate-sufficient and -deficient mineral media were chosen to assess the performance  
121 of the EcoFAB system in reproducing well-described effects of phosphate starvation, and a  
122 complex sterilized soil extract was chosen as representation of a more natural environment with  
123 yet uncharacterized effects on plant morphology and metabolism. We hypothesized that the use  
124 of the EcoFAB system produces data reproducible across laboratories, and that *B. distachyon*  
125 grown in the various media would result in distinct metabolic and morphological changes.

## 126 **Material and Methods**

### 127 **EcoFAB preparation**

128 EcoFAB devices were fabricated according to the published method (Gao *et al.*, 2018).  
129 Briefly, an 1:10 silicone elastomer curing agent : base mixture (PDMS, Ellsworth Adhesives) was  
130 poured onto a 3D-printed mold, and allowed to solidify at 80°C for 4 h. The PDMS layer was  
131 separated from the mold, the edged trimmed, and permanently bonded to a glass microscope  
132 slide. The EcoFAB device and outer chamber were sterilized by incubation in 70% v/v ethanol  
133 for 30 min, followed by incubation in 100% v/v ethanol for 5 min. After evaporation of residual

134 ethanol, the EcoFAB device was rinsed three times with the growth medium of choice before  
135 transferring seedlings.

### 136 **Plant growth conditions**

137 All experiments were performed with *Brachypodium distachyon* Bd21-3 (Vogel & Hill,  
138 2007). Seeds were dehusked and sterilized in 70% v/v ethanol for 30 s, and in 6% v/v NaOCl,  
139 0.1% v/v Triton X-100 for 5 min, followed by five wash steps in water. Seedlings were  
140 germinated on 0.5x Murashige & Skoog plates (2.2 g l<sup>-1</sup> MS medium, MSP01, Caisson Laboratories  
141 with 1650 mg L<sup>-1</sup> NH<sub>4</sub>NO<sub>3</sub>, 6.2 mg L<sup>-1</sup> H<sub>3</sub>BO<sub>3</sub>, 332.2 ml L<sup>-1</sup> CaCl<sub>2</sub>, 0.025 ml L<sup>-1</sup> CoCl<sub>2</sub>, 0.025 ml L<sup>-1</sup>  
142 CuSO<sub>4</sub>, 37.26 mg L<sup>-1</sup> C<sub>10</sub>H<sub>14</sub>N<sub>2</sub>Na<sub>2</sub>O<sub>8</sub>, 27.8 mg L<sup>-1</sup> FeSO<sub>4</sub>\*7H<sub>2</sub>O, 180.7 mg L<sup>-1</sup> MgSO<sub>4</sub>, 16.9 ml L<sup>-1</sup>  
143 MnSO<sub>4</sub>\*H<sub>2</sub>O, 0.25 mg L<sup>-1</sup> NaMoO<sub>4</sub>\*2H<sub>2</sub>O, 0.83 mg L<sup>-1</sup> KI, 1900 mg L<sup>-1</sup> KNO<sub>3</sub>, 170 mg L<sup>-1</sup> KH<sub>2</sub>PO<sub>4</sub>,  
144 8.6 mg L<sup>-1</sup> ZnSO<sub>4</sub>\*7H<sub>2</sub>O; 6% w/v Bioworld Phytoagar, 401000721, Fisher Scientific, pH adjusted  
145 to 5.7) in a 16 h light / 8 h dark regime at 24°C. EcoFABs were sterilized as published, and  
146 seedlings transferred to EcoFAB chambers at three days after germination (dag) as previously  
147 described (Gao *et al.*, 2018). Seedlings with comparable size were picked to conduct the  
148 experiment, and were distributed in a random manner to the various EcoFABs. EcoFABs were  
149 incubated in a 16 h light / 8 h dark regime at 24°C, with 150 µE illumination. The EcoFABs were  
150 filled with 2 ml of 0.5x MS (*B. distachyon* grows without phenotypically detectable nutrient  
151 limitation, 'phosphate-sufficient', 2.2 g l<sup>-1</sup> MS medium, MSP01, Caisson Laboratories, pH adjusted  
152 to 5.7), 0.5x MS-P (*B. distachyon* leaves turn yellow as a sign of malnutrition, 'phosphate-  
153 deficient', 2.2 g l<sup>-1</sup> MS medium without phosphate, composition is the same as MSP01 without  
154 170 mg L<sup>-1</sup> KH<sub>2</sub>PO<sub>4</sub>, MSP11, Caisson Laboratories, pH adjusted to 5.7), or soil extract. The soil  
155 extract was prepared by incubating 100 g of a standard greenhouse soil (Pro-Mix PGX, Hummert  
156 International) in 1 l of water for 16 h at 4°C and gentle shaking, followed by filtration through a  
157 0.2 µm cellulose nitrate filter (09-761-104, Corning) for sterilization. The soil extract was stored  
158 at 4°C, and its phosphate content was determined as 145 µM (Ames, 1966), which is four times  
159 lower compared to 0.5x MS. Although we did not perform additional nutrient analyses, it is likely  
160 that levels of other nutrients besides phosphate are also low, compared to 0.5x MS.

161 A comparative study of *B. distachyon* in EcoFABs versus plates was performed by  
162 laboratory 1, in which *B. distachyon* seeds were sterilized and germinated on 0.5x MS plates for 3  
163 days as described above, then either transferred to EcoFAB growth chambers containing 0.5x MS

164 liquid medium as described (Gao *et al.*, 2018), or to 0.5x MS phytoagar plates. Roots were imaged  
165 weekly, and total root area was measured using the Image J software suite (version 2.0.0). For  
166 the developmental timecourse, plants were grown in EcoFAB chambers in 0.5x MS for up to 43  
167 days, and exudates were collected at indicated times (Fig. S1), frozen, and stored at -80°C.  
168 Metabolites were analyzed as described below.

### 169 **EcoFAB inter-laboratory experiment**

170 An overview of the experimental procedure is provided in Fig. 1, and the participating  
171 laboratories are listed in Table S1. The following material was distributed from laboratory 1 to  
172 the participating laboratories: EcoFAB growth chambers, micropore tape to seal the EcoFABs, *B.*  
173 *distachyon* seeds, MS powder, MS-P powder, liquid soil extract (see 'Plant growth conditions'),  
174 phytoagar, light & temperature data loggers (HOBO Onset, UA-002-08), and a detailed protocol  
175 for plant growth and experimental procedures. The experiments were conducted in parallel by  
176 the different laboratories. Each participating laboratory sterilized EcoFABs and seeds as  
177 described (Gao *et al.*, 2018). Growth conditions were monitored throughout the experiment, and  
178 are reported in Table S1. Plants were grown in quadruplicates for each experimental condition,  
179 and one control EcoFAB was set up per condition without plants. Sterility was monitored  
180 throughout the experiment by plating 50 µl of growth media on Luria-Bertani (LB) plates every  
181 week. Contaminated chambers were excluded from analysis.

182 Root systems in EcoFABs were imaged at 7, 14, and 21 days after transfer (dat) to the  
183 EcoFAB chambers. Total root length was quantified by laboratory 1 with the SmartRoot plugin  
184 (version 4.21) for the ImageJ software (version 2.0.0)(Lobet *et al.*, 2011). Root hairs were  
185 imaged at 21 days with 10x magnification, and their length was determined with ImageJ. The  
186 data presented is an average of three measurements per imaged root.

187 Growth media was replenished to 2 ml three times a week, and the media were  
188 exchanged fully at 20 dat. This medium was removed through the sampling port by pipetting  
189 after 24 h of further incubation, and the volume was recorded. The root exudates were frozen  
190 immediately, stored at -80°C, and shipped to laboratory 1 for metabolite analysis. The fresh  
191 weight of root and shoot tissue was recorded, and the tissue was immediately frozen and stored  
192 at -80°C. The tissue was homogenized by the participating laboratories by their method of choice  
193 (mortar and pestle with liquid nitrogen, or steel beads with a bead beater). An aliquot of the

194 tissue was utilized for phosphate content determination by all participating laboratories (Ames,  
195 1966), and an aliquot was sent back to laboratory 1 for metabolite analysis.

### 196 **Liquid chromatography mass spectrometry sample extraction**

197 Homogenized root tissues were extracted two times with 700  $\mu\text{l}$  100% LC/MS grade  
198 methanol (CAS 67-56-1, Honeywell Burdick & Jackson, Morristown, NJ) for 1 h at 4°C. The  
199 samples were centrifuged for 5 min at 5000 g, 4°C, supernatants were pooled and evaporated  
200 under vacuum at 25°C until dry. The samples were resuspended in 100% LC/MS grade methanol  
201 with 15  $\mu\text{M}$  internal standards (767964, Sigma-Aldrich) with a volume relative to the sample  
202 fresh weight (11 mg / 100  $\mu\text{l}$ ).

203 Frozen root exudates were lyophilized using a Labconco FreeZone lyophilizer,  
204 resuspended in 500  $\mu\text{l}$  LC/MS grade methanol (CAS 67-56-1, Honeywell Burdick & Jackson,  
205 Morristown, NJ), sonicated for 15 min in a water bath at 23°C, and incubated at 4°C for 16 h for  
206 salt precipitation. Samples were then centrifuged for 5 min at 5000 g, 4°C, supernatants were  
207 transferred to new microcentrifuge tubes, and evaporated at 25°C under vacuum until dry.  
208 Samples were resuspended in 100% LC/MS grade methanol with 15  $\mu\text{M}$  internal standards  
209 (767964, Sigma-Aldrich) with a volume relative to the root tissue fresh weight, and the root  
210 exudate volume collected (20  $\mu\text{l}$  methanol 100  $\text{mg}^{-1}$  fresh weight  $\text{ml}^{-1}$  exudate volume).

### 211 **Liquid chromatography – mass spectrometry method and analysis**

212 Metabolites in samples were chromatographically separated using hydrophilic liquid  
213 interaction chromatography on a SeQuant 5  $\mu\text{m}$ , 150 x 2.1 mm, 200 Å zic-HILIC column  
214 (1.50454.0001, Millipore) and detected with a Q Exactive Hybrid Quadrupole-Orbitrap Mass  
215 Spectrometer equipped with a HESI-II source probe (ThermoFisher Scientific). For  
216 chromatographic separations, an Agilent 1290 series HPLC system was used with a column  
217 temperature of 40°C, 3  $\mu\text{l}$  sample injections, and 4°C sample storage. A gradient of mobile phase  
218 A (5 mM ammonium acetate in water) and B (5 mM ammonium acetate, 95% v/v acetonitrile in  
219 water) was used for metabolite retention and elution as follows: column equilibration at 0.45 ml  
220  $\text{min}^{-1}$  in 100% B for 1.5 min, a linear gradient at 0.45 ml  $\text{min}^{-1}$  to 35% A over 13.5 minutes, a  
221 linear gradient to 0.6 ml  $\text{min}^{-1}$  and to 100% A over 3 min, a hold at 0.6 ml  $\text{min}^{-1}$  and 100% A for 5  
222 min followed by a linear gradient to 0.45 ml  $\text{min}^{-1}$  and 100% B over 2 min and re-equilibration  
223 for an additional 7 min. Each sample was injected twice: once for analysis in positive ion mode



224 and once for analysis in negative ion mode. The mass spectrometer source was set with a sheath  
225 gas flow of 55, aux gas flow of 20 and sweep gas flow of 2 (arbitrary units), spray voltage of  $|\pm 3|$   
226 kV, and capillary temperature of 400°C. Ion detection was performed using the Q Exactive's data  
227 dependent MS2 Top2 method, with the two highest abundance precursory ions (2.0 m/z  
228 isolation window, 17,500 resolution, 1e5 AGC target, 2.0m/z isolation window, stepped  
229 normalized collisions energies of 10, 20 and 30 eV) selected from a full MS pre-scan (70-1050  
230 m/z, 70,000 resolution, 3e6 AGC target, 100 ms maximum ion transmission) with dd settings at  
231 1e3 minimum AGC target, charges excluded above  $|3|$  and a 10 s dynamic exclusion window.  
232 Internal and external standards were included for quality control purposes, with blank injections  
233 between every unique sample.

### 234 **Metabolite identification and statistical analysis**

235 LC/MS data was analyzed with Metabolite Atlas to construct extracted ion  
236 chromatograms corresponding to metabolites contained within our in-house standards library  
237 (<https://github.com/biorack/metatlas>)(Bowen & Northen, 2010; Yao *et al.*, 2015). For  
238 metabolite identification, chemical classes were assigned using the ClassyFire compound  
239 classification system (Djoumbou Feunang *et al.*, 2016). Metabolites were identified following the  
240 conventions defined by the Metabolomics Standards Initiative (Sumner *et al.*, 2007)(Table S2,  
241 S3). All assignments were of the highest confidence ('level 1' MSI identifications), which is  
242 identified as at least two orthogonal measures vs. authentic chemical standards (*e.g.* retention  
243 time and fragmentation spectra). In all cases we used three orthogonal measures, retention time  
244 (within 1 minutes vs. standard), fragmentation spectra (manual inspection), and accurate mass  
245 (within 20 ppm). In general accurate masses were within 5 ppm, though the error was higher for  
246 low mass ions in negative mode. Peak height and retention time consistency for the LC/MS run  
247 was ascertained by analyzing quality control samples that were included at the beginning,  
248 during, and at the end of the run. Internal standards were used to assess sample-to-sample  
249 consistency for peak area and retention times.

250 Metabolite background signals detected in the extraction blanks, 0.5x MS and 0.5x MS-P  
251 control samples were subtracted from the experimental sample peak heights. Further,  
252 metabolite peak heights were normalized by setting the maximum peak height detected in any  
253 sample to 100%. The method utilized here allows for the relative comparison of peak heights

254 between samples (e.g. if a compound of interest is present in significantly different amounts  
255 between samples), but not for absolute metabolite level quantification (e.g.  $\mu\text{g}$  of a compounds of  
256 interest per gram tissue). To explore the variation between growth conditions, the metabolite  
257 profiles were PCA-ordinated, and the 95% confidence level was displayed as ellipses for each  
258 treatment. Hierarchical clustering analysis with a Bray Curtis Dissimilarity Matrix was  
259 performed with the python 2.7 Seaborn package. The significance between root tissue as well as  
260 root exudate metabolic profiles was analyzed with the python SciPy ANOVA test coupled to a  
261 python Tukey's honestly significant difference test with  $\alpha = 0.05$  corresponding to a 95%  
262 confidence level for each metabolite. Statistically significant metabolites were displayed as bar  
263 graphs, where the sum of all values added up to 100% (Fig. 4, Fig. S4), or as fold change for soil  
264 extract exudates divided by soil extract controls (Fig. 5).

## 265 Results

### 266 The EcoFAB growth system design and benchmarking

267 The EcoFAB device is comprised of a PDMS layer bonded to a glass slide, and an outer box  
268 to maintain sterility (Gao *et al.*, 2018) with a plant reservoir to hold the seedling, and a sampling  
269 port for to addition or exchange of growth medium (Fig. S1A). *B. distachyon* can be grown in  
270 EcoFABs for multiple weeks (Fig. S1B depicts a three-week-old *B. distachyon* plant), facilitating  
271 the investigation of various developmental stages from seedlings to adult plants.

272 We benchmarked *B. distachyon* growth in the EcoFAB vs. on standard agar plates. We  
273 found that *B. distachyon* roots develop similarly in EcoFABs containing 0.5x MS medium as  
274 compared to growth on 0.5x MS agar plates over the course of five weeks, with no significant  
275 differences in total root area observed except for week 2 ( $p = 0.05$ ) (Fig. S1C). In addition,  
276 sampling of *B. distachyon* root exudates at different developmental stages showed a gradual shift  
277 of exudate profiles over time (Fig. S1D), consistent with reports for plants in other growth  
278 systems (Chaparro *et al.*, 2013; Zhalnina *et al.*, 2018).

### 279 Multi-lab investigation of EcoFAB data reproducibility

280 EcoFab materials were distributed to four participating laboratories that ran the same  
281 experiment in parallel, investigating morphological and metabolic changes of *B. distachyon*

282 grown in phosphate-sufficient, phosphate-deficient, or soil extract medium (4.3 times less  
283 phosphate than phosphate-sufficient medium). Roots were imaged on a weekly basis, and after  
284 three weeks, each laboratory determined the fresh weight and phosphate content of root and  
285 shoot tissue, and sampled root tissue and exudates for LC/MS analysis (Fig. 1).

286 Growth conditions (light intensity, day length, and temperature) were comparable  
287 between laboratories throughout the experiment (Table S1). The fresh weight and phosphate  
288 content were consistent across laboratories, and different between experimental treatments  
289 (Fig. 2a, b): as expected, phosphate-deficient plants had significantly lower phosphate content,  
290 and less than half the fresh weight of phosphate-sufficient plants (Tukey's test,  $p=0.05$ ).  
291 Interestingly, soil extract-grown plants showed a mixed response, in that they resembled  
292 phosphate-deficient plants in phosphate content and shoot weight, but their root weight was  
293 significantly lower than of phosphate-sufficient plants, and more similar to phosphate-sufficient  
294 plants. The root:shoot fresh weight ratio averaged across all laboratories was 0.9 for phosphate-  
295 sufficient plants, 1.3 for phosphate-deficient plants, and 1.8 for soil extract-grown plants (Fig.  
296 S2).

297 Upon receiving samples from each laboratory following the experiment, laboratory 1  
298 extracted and analyzed metabolites, generating metabolite profiles from root tissues and  
299 exudates using LC/MS. The metabolic profiles of root tissues were comparable across  
300 laboratories, and reproducibly demonstrated a clear separation between experimental  
301 conditions in a principal component analysis plot and in a hierarchical clustering analysis (Fig.  
302 2c, Fig. S3a, Tukey' honestly significance test,  $p = 0.05$ ). Similarly, the metabolic profiles of root  
303 exudates were comparable across laboratories and showed a separation between soil extract  
304 and other growth conditions (Fig. 2d, Fig. S3b).

305 Root morphology (quantified by laboratory 1) was similarly different between  
306 experimental treatments. Plants grown in phosphate-sufficient conditions formed root systems  
307 extending across most of the EcoFAB root chambers, whereas phosphate-deficient roots did not  
308 reach as far. Soil-extract grown roots also reached across the entire root chamber, with overall  
309 less roots compared to phosphate-sufficient plants, but visibly elongated root hairs (Fig. 3a).  
310 Quantification of total root length averaged across laboratories was 7 cm at 7 days after transfer  
311 (dat) for all plants, increased to 40 cm, 22 cm, and 30 cm at 14 dat, and further to 114 cm, 48 cm,

312 and 67 cm for phosphate-sufficient, phosphate-deficient, and soil extract-grown plants,  
313 respectively. Differences between experimental treatments were first visible 14 dat with  
314 phosphate-deficient plants exhibiting shorter total root length than phosphate-sufficient plants  
315 (Tukey,  $p=0.05$ ), but became more pronounced by 21 dat, with phosphate-sufficient plants  
316 exhibiting longer total root length than those grown in soil extract, which in turn were longer  
317 than of phosphate-deficient plants (Fig. 3b). Interestingly, root morphology varied somewhat  
318 between laboratories, the absolute measurements differed up to a factor of 2, with plants grown  
319 in laboratories 1 and 4 exhibiting consistently higher total root length than plants of laboratories  
320 2 and 3 (Fig. S4). Specifically, total root length was 75-150 cm in phosphate-sufficient, 32-62 cm  
321 in phosphate-deficient, and 44-87 cm in soil extract conditions (Fig. S4).

322 To summarize, the root and shoot fresh weight and phosphate content, root and exudate  
323 metabolic profiles, and total root length was consistent across laboratories and distinct for the  
324 experimental treatments.

### 325 **Distinct root morphology in soil extract**

326 In addition to the high root:shoot ratio observed for soil extract-grown plants (Fig. S2),  
327 plants grown in soil extract had longer root hairs compared to plants grown in other conditions  
328 which were visible even under low-magnification (Fig. 3a, c). Interestingly, quantification  
329 revealed that root hairs on primary soil extract-grown roots reached a length of 0.8 mm, which  
330 was four times longer compared to phosphate-sufficient or phosphate-deficient grown roots.  
331 Root hair length of lateral roots remained unchanged (Fig. 3d).

### 332 **Metabolic analysis of root tissue and exudates**

333 Metabolites extracted from root tissue and root exudates were found to be distinct  
334 between experimental treatments (Fig. 2c, d). Based on authentic metabolite standards, a broad  
335 range of metabolites was detected in root tissues as well as in exudates, among them organic  
336 acids, carbohydrates, nucleosides/nucleotides/nucleic bases, amino acids and other nitrogenous  
337 compounds, benzenoids, and fatty acids.

338 Half of the metabolites detected in root tissue extracts (52 out of 117 compounds) were  
339 significantly different in pairwise comparisons of experimental treatments, with 28% having  
340 highest abundance in phosphate-sufficient, 30% in phosphate-deficient, and 25% in soil extract-

341 grown roots (Fig. 4, Table S2). The significantly different metabolites (p-value < 0.05) could be  
342 grouped into four main clusters (Fig. 4): Cluster I consists of three metabolites significantly  
343 different between all experimental treatments. Cluster II is composed of metabolites abundant in  
344 phosphate-sufficient roots, including: nucleosides, organic acids, amino acids, and notably, all  
345 phosphorous compounds present in this dataset. The higher abundance of phosphorous  
346 compounds in phosphate-sufficient roots compared to phosphate-deficient or soil extract-grown  
347 roots is in line with the phosphate quantification of plant tissues (Fig. 2b), in which highest free  
348 phosphate was detected in phosphate-sufficient plants, as would be expected. Cluster III includes  
349 metabolites abundant in phosphate-deficient roots. All these metabolites are nitrogenous  
350 compounds, likely due to the nitrogen-phosphate imbalance of phosphate-deficient plants.  
351 Cluster IV contains metabolites distinct for soil extract-grown roots, and is split in two  
352 subclusters. IVa includes metabolites with low abundance in soil extract roots, which are mostly  
353 nitrogenous compounds, whereas IVb includes metabolites with high abundance in soil extract  
354 roots, which are mostly organic acids.

355 Overall, 137 metabolites were identified in root exudates (Table S3). Only  
356 phenylacetaldehyde was significantly different between exudates of phosphate-sufficient and -  
357 deficient plants (Table S3), which explains why these conditions are not separated in a principal  
358 component analysis (Fig. 2d). Plants grown in soil extracts had a distinct exudate composition  
359 with 27 and 25 distinct compounds vs. phosphate-sufficient and phosphate-deficient root  
360 exudates, respectively. Most of these distinct metabolites were most abundant in soil extract  
361 controls (no plant), showed medium abundance in soil extract exudates, and had low abundance  
362 in the other conditions (Fig S4).

363 Metabolite comparisons between soil extract with and without plants revealed that half of  
364 the metabolites detected (74 of 136 compounds) were altered in abundance, causing a distinct  
365 grouping in a principal component analysis (Fig. S6). Fifty percent of these metabolites were  
366 depleted in the presence of plants (Table S3, Fig. S5). Although individual metabolite levels  
367 varied somewhat across laboratories, this finding was consistent across participating  
368 laboratories (Fig. S7). Distinct metabolites included organic acids, carbohydrates, amino acids,  
369 and nucleosides, and these compounds contain various groups such as phosphate, nitrogen, or  
370 sulfur (Fig. 5, Table S3). Furthermore, citric acid exhibited an interesting but statistically

371 insignificant trend of higher abundance in soil extract exudates vs. controls (Table S3, Anova  $p =$   
372 0.23, T-Test  $p = 0.04$ ).

373 Metabolites that were detected in root tissue and root exudates showed distinct patterns:  
374 42% of these metabolites were significantly different in roots and 43% in exudates, depending  
375 on environments. Only 23% of the compounds were significantly different in both datasets,  
376 which indicates that root exudates are metabolically distinct from root tissue (Fig. 4, Fig. S5,  
377 Table S2, Table S3). We similarly found that only 50% of the metabolites depleted from soil  
378 extract were significantly different in root tissues, with 29% of high abundance in soil extract  
379 roots (mostly organic acids), 25% of low abundance, and 46% are not detected (nitrogenous  
380 compounds).

## 381 Discussion

### 382 Reproducibility of morphological and metabolic data in EcoFABs

383 This study investigated the reproducibility of morphological and metabolic responses of  
384 the model grass *B. distachyon* grown in EcoFABs in phosphate-sufficient and phosphate-deficient  
385 mineral medium, and in chemically complex but sterile soil extract. We purposely chose  
386 phosphate starvation as an experimental system, as the morphological and metabolic responses  
387 of plants are well described, and should be reproducible in a system such as the EcoFAB. The soil  
388 extract medium was added to represent a more natural environment, but was sterilized to  
389 exclude effects of microbial metabolism on exudation, and to lower variability of the system.

390 We found that *B. distachyon* fresh weight, phosphate content, and metabolic profiles were  
391 distinct for our experimental conditions and that these responses were reproducible across the  
392 four participating laboratories. The investigated traits included tissue fresh weight and  
393 phosphate content, total root length, and metabolic profiles of roots and exudates. These results  
394 compare favorably to a related study comparing three *Arabidopsis thaliana* genotypes grown in  
395 soil in pots by ten laboratories (Massonnet *et al.*, 2010) where, similar to this study, materials  
396 were distributed from one laboratory, growth conditions were monitored at each laboratory,  
397 and one laboratory analyzed leaf morphology, metabolomic and transcriptomic profiles.  
398 Although one trait was similar between a core group of four laboratories, all traits significantly

399 varied across laboratories. The authors attributed the variance to the strong influence of small  
400 environmental changes in their soil pot system (Massonnet *et al.*, 2010). Our EcoFAB setup  
401 comprised a more uniform and controlled growth environment than pots filled with soil, which  
402 is likely one cause of the higher reproducibility observed here. Another equalizing factor might  
403 have been the use of sterilized soil extract in this study, which did not take into consideration the  
404 complex physical and mineral properties of soil, or the effects of microorganisms. It could be that  
405 integrating these factors in future EcoFAB studies might increase the variability of the system. It  
406 will be important to investigate the reproducibility as well as the morphological and metabolic  
407 responses of plants to microbial communities and soil mineralogy, as natural soils were  
408 identified as main contributors shaping root morphology, plant carbon exudation, plant-microbe  
409 interactions, and rhizosphere extension (Bulgarelli *et al.*, 2013; Koebernick *et al.*, 2017; Holz *et*  
410 *al.*, 2017; Edwards *et al.*, 2018). Overall, we conclude that the reproducibility of plant traits in  
411 soil extract EcoFABs is a promising first step towards developing plant growth systems  
412 generating reproducible data that are relevant to field environments.

#### 413 **Metabolic profiles of roots were more distinct than of exudates**

414 Root metabolic profiles were clearly distinct between experimental treatments.  
415 Phosphate-sufficient roots were abundant in nucleosides, amino acids, organic acids, and  
416 phosphorous compounds, whereas phosphate-deficient roots accumulated nitrogenous  
417 compounds, and soil extract-grown roots were deficient in nitrogenous compounds, but  
418 accumulated carbohydrates (Fig 4). It will be interesting to investigate if shoot metabolic profiles  
419 are similarly distinct between experimental treatments in a future study.

420 The metabolites detected in *B. distachyon* root exudates in this study (Table S3) were  
421 comparable to metabolites detected in exudates of other grasses such as wheat (Iannucci *et al.*,  
422 2017), maize (Carvalhais *et al.*, 2011), rice (Bacilio-Jiménez *et al.*, 2003), *Avena barbata*  
423 (Zhalnina *et al.*, 2018) and dicots such as *Arabidopsis* (Chaparro *et al.*, 2013). Similarly, the *B.*  
424 *distachyon* exudation profile varied with developmental stage, as reported for other plants (Fig.  
425 S1) (Chaparro *et al.*, 2013; Zhalnina *et al.*, 2018).

426 The largest exudate metabolic differences in this study were observed between plants  
427 grown in soil extract and soil extract controls without plants. Surprisingly, we did not find many  
428 statistical differences in exudates of plants grown in phosphate-sufficient vs. -deficient

429 conditions. For many plants, an increase in organic acid exudation in low phosphate conditions  
430 was reported (Neumann & Martinoia, 2002; Plaxton & Tran, 2011; Thijs *et al.*, 2016), which was  
431 not found in our dataset. This might be due several reasons. First, plants were grown without  
432 phosphate for the entire growth period and might have ceased differential exudation when  
433 sampled after three weeks. Second, the small EcoFAB volume likely allows for re-uptake of  
434 exuded metabolites, mimicking differential exudation of compounds. Third, the exudation  
435 response of *B. distachyon* to phosphate starvation might not be as pronounced as in other  
436 species, and be below the detection limit in our assay. Future experiments focusing on the timing  
437 and magnitude of *B. distachyon* exudation changes in response to phosphate starvation would be  
438 able to address these points. The clear differences observed for fresh weight, tissue phosphate  
439 content, and root metabolic profile indicate that the plants indeed were starved for phosphate in  
440 our experimental setup.

#### 441 **Plants deplete metabolites from soil extract**

442 The main differences in exudate metabolic profiles in this study were due to a depletion  
443 of metabolites from soil extract by plants (Fig. 5, Table S3). With our experimental setup, we are  
444 unable to determine if metabolites are depleted due to uptake by plant roots, or due to for  
445 example chemical reactions caused by an altered pH around plant roots. Experiments with  
446 isotopically labeled compounds spiked into soil extract could address the fate of metabolites of  
447 interest in future experiments.

448 In addition to depletion of metabolites, a trend for increased citric acid levels in soil  
449 extract-grown plants was observed. This might constitute a starvation response, given that  
450 exudation of organic acids is a characteristic of phosphate-limited plants (Neumann & Martinoia,  
451 2002; Plaxton & Tran, 2011). The fact that half of the soil extract metabolites, among them  
452 organic acids, amino acids, nucleosides, and carbohydrates, are depleted by plants is surprising,  
453 as it suggests that plants not only are producers, but also consumers of a significant amount of  
454 compounds. Various nitrogenous compounds are depleted from soil extract by plants. Among  
455 them is pterin, which is a folate precursor. Folate is an essential part of human diet, and thus,  
456 studying uptake of pterin by plants to elevate folate levels might be an interesting  
457 biofortification strategy (Strobbe & Van Der Straeten, 2017). Xanthine is part of the purine  
458 degradation pathway in plants, and can act as a sole nitrogen source for *Arabidopsis thaliana*



459 growth (Brychkova *et al.*, 2008). Similarly, thymine thymidine, and N-acetyl-L-glutamic acid  
460 could be utilized directly for synthesis of nucleic acids and amino acids, respectively. In addition,  
461 plants deplete complex organoheterocyclic compounds such as the ascorbic acid precursor  
462 gulonolactone (Smirnoff, 2018), as well as simple carbohydrates such as sucrose. Uptake of these  
463 compounds by roots would indicate that plants grow partially heterotrophic in specific  
464 environments, importing simple and complex biomass precursors.

465 There is only a small amount of literature regarding uptake of metabolites by roots:  
466 amino acids and sugars were reported to be imported by roots in mineral medium assays where  
467 compounds were spiked in (Jones & Darrah, 1994; Yamada *et al.*, 2011), whereas organic acids  
468 are likely not imported at significant amounts (Jones & Darrah, 1995). There is evidence that  
469 plants are capable to (re)import carbon from environments (Jones & Darrah, 1993), but overall,  
470 the scope of how much and which metabolites are taken up by plants from natural environments  
471 is currently unknown. In another experimental system comprising of a cyanobacteria and  
472 associated heterotrophs, it was found that the primary producer depleted 26% of biological soil  
473 crust metabolites, whereas soil heterotrophs only depleted 13% of metabolites (Baran *et al.*,  
474 2015). This might suggest that photoautotroph organisms in general not only release, but also  
475 deplete a significant amount of compounds from the environment. Plants might compete with  
476 microbes for nutrient soil organic compounds in certain environmental conditions. Besides  
477 nutritional functions, compounds could act as signals, as exemplified by a recent study that  
478 found the depletion of plant-derived phenolic acids to be associated with rhizosphere microbes  
479 (Zhalnina *et al.*, 2018).

480 Many of the plant-depleted metabolites contained nitrogen, phosphate, or sulfur groups  
481 (Fig. 5, Table S3), which suggests that plants not only use inorganic forms, but also more  
482 complex compounds as nutrients. Consistent with this hypothesis, compounds containing the N,  
483 P, and S groups are low in soil extract-grown roots, likely indicating a fast turnover rate. It was  
484 suggested that amino acid uptake might account for 30%-90% of imported nitrogen, depending  
485 on the environmental conditions (Jones & Darrah, 1994; Yamada *et al.*, 2011), but overall, data  
486 on how much elements are taken up as inorganic vs. organic compounds is missing. In contrast  
487 to N, P, and S containing compounds, carbohydrate-type compounds were of high abundance in

488 soil extract-grown roots, likely due to a low external demand for carbohydrates by plant tissues  
489 (Fig. 4).

490 Interestingly, plants depleted metabolites from soil extract in a selective manner,  
491 suggesting that the plant controls depletion of metabolites to a certain degree. Similarly, the  
492 difference between root and exudate metabolic profiles (Fig. 4, Fig. S5) indicates that plants  
493 control exudation to some degree. Selectivity in import and export processes could be achieved  
494 by the presence of transport proteins that were described for a number of metabolites (Sasse *et*  
495 *al.*, 2018), and investigation of transport processes is a promising direction for future studies.  
496 We conclude that plants not only significantly alter their environment by export, but also by  
497 depletion of metabolites.

#### 498 **Distinct plant growth in soil extract**

499 In this study, plants were grown in basal salt medium widely used in standard laboratory  
500 settings, and in soil extract medium that includes water soluble metabolites, but that excludes  
501 additional factors defining soils, such as presence of other metabolically active organisms, or  
502 solid soil particles.

503 We observed increased root:shoot ratio in plants grown in soil extract, which might point  
504 to nutrient limitations (Cai *et al.*, 2011), consistent with the low phosphate content of soil  
505 extract, and of soil extract-grown plants (Fig. 2b, Fig. S2). Interestingly, altered root:shoot ratios  
506 were recently also detected for wheat genotypes grown in different soils (Iannucci *et al.*, 2017),  
507 suggesting that different soils might affect root:shoot ratio and possibly also metabolic profiles  
508 in different ways.

509 The most prominent phenotypic difference observed for soil extract-grown plants was  
510 the four-fold increase in root hair length compared to other plants (Fig. 3). Root hair elongation  
511 can be caused by altered nutrient levels (*e.g.* phosphate, nitrogen, potassium, iron,  
512 micronutrients) (Senga *et al.*, 2017; Zhang *et al.*, 2018), and depends on the growth condition  
513 used (Nestler *et al.*, 2016). Further, the response to phosphate is concentration dependent (Bates  
514 & Lynch, 1996), which might be the cause for the different root hair phenotype observed in  
515 phosphate-deficient medium versus phosphate-limited soil extract. Alternatively, the presence of  
516 microbes and microbe-derived metabolites that alter plant hormone homeostasis could also

517 cause the phenotype observed in soil extract (López-Bucio *et al.*, 2007; Ortiz-Castro *et al.*, 2011;  
518 Zamioudis *et al.*, 2013; Vacheron *et al.*, 2013). Compounds such as tryptophan and salicylate  
519 detected in soil extract are reported to alter root morphology (Vacheron *et al.*, 2013), and thus  
520 are candidates for causing elongated root hairs. We suggest that the long root hair phenotype  
521 observed could be a result of soil extract nutrient levels and specific concentrations of signaling  
522 compounds. The determination of the causal factor(s) resulting in the long root hair phenotype  
523 represents an important future direction.

524         Root hair length was shown to have a significant impact on how plants grow in natural  
525 soils, and how plants interact with their environment. Root hairs alter physical properties of the  
526 soil, such as the extension of the rhizosphere, and the pore size development in soils (Koebernick  
527 *et al.*, 2017; Holz *et al.*, 2017). Root hairs also affect biotic interactions by defining the  
528 rhizosphere and the amount of carbon exuded from roots (Koebernick *et al.*, 2017; Holz *et al.*,  
529 2017). The complex morphological and metabolic alterations of *B. distachyon* when grown in soil  
530 extract stresses the importance of not only considering standard laboratory growth media, but  
531 also more natural substrates when studying plant - environment interactions. It would be  
532 interesting to investigate how root hair length changes when solid particles, microbial  
533 communities, or both are added back to the soil extract used in this study, to investigate  
534 morphology changes in a more natural environment. In addition, the observation that increased  
535 root hair length was restricted to primary roots but not observed on lateral roots highlights the  
536 need for high spatial resolution when measuring root traits, even in a simplified system like the  
537 EcoFAB.

538         In conclusion, EcoFABs are reproducible tools to study a variety of topics, and this  
539 reproducibility enables inter-laboratory studies of plant - environment interactions. Their low  
540 cost, flexibility, and compatibility with metabolomics studies enables investigations of  
541 increasingly complex conditions simulating specific natural environments. We found that *B.*  
542 *distachyon* growth in EcoFABs was reproducible across four laboratories for a number of  
543 morphological and metabolic traits, including tissue fresh weight and phosphate content, total  
544 root length, and metabolic profiles of root tissue and root exudates. In addition, plants grown in  
545 soil extract exhibited an altered root:shoot ratio and elongated root hairs, and depleted half of  
546 the investigated metabolites from soil extract. An important next step in the development of

547 more field relevant EcoFABs will be the ability to include solid materials and microbial  
548 communities that reflect additional important aspects of soils.

## 549 Acknowledgements

550 This work was supported by the Microbial Community Analysis and Functional  
551 Evaluation in Soils Program at Lawrence Berkeley National Laboratory supported by the U.S.  
552 Department of Energy, Office of Science, Office of Biological & Environmental Research, Genomic  
553 Sciences Program under contract DE-AC02-05CH11231 at the U.S. Department of Energy Joint  
554 Genome Institute, a DOE Office of Science User Facility. The research used resources of the  
555 National Energy Research Scientific Computing Center, a DOE Office of Science User Facility  
556 supported by the Office of Science of the U.S. Department of Energy under contract number DE-  
557 AC02-05CH11231. In addition, J.S. was supported by a NSF grant to University of California  
558 Berkeley (NSF Proposal 1617020), and K.Z. by the DE-SC0014079 award to the University of  
559 California Berkeley. J.L.D. was supported by NSF INSPIRE grant IOS-1343020, by the Office of  
560 Science (BER), US Department of Energy, grant no. DE-SC0014395 and by the HHMI. J.L.D. is an  
561 Investigator of HHMI.

## 562 Author contributions

563 J.S, J.G., and T.R.N. developed the hypothesis, J.S., J.K., B.J.C., A.P.K., J.G., K.L., K.Z. and B.A.  
564 conducted experiments, J.S., J.K., B.J.C., A.P.K., B.A., P.S., S.K., B.P.B, K.Z. and D.T. performed data  
565 analyses. J.S. and T.N. wrote the paper, and all authors provided comments on the manuscript.

## 566 References

- 567 **Ames BN. 1966.** Assay of inorganic phosphate, total phosphate and phosphatases. *methods in*  
568 *enzymology* **8**: 115–118.
- 569 **Bacilio-Jiménez M, Aguilar-Flores S, Ventura-Zapata E, Pérez-Campos E, Bouquelet S,**  
570 **Zenteno E. 2003.** Chemical characterization of root exudates from rice (*Oryza sativa*) and their  
571 effects on the chemotactic response of endophytic bacteria. *Plant and Soil* **249**: 271–277.
- 572 **Baran R, Brodie EL, Mayberry-Lewis J, Hummel E, Da Rocha UN, Chakraborty R, Bowen BP,**  
573 **Karaoz U, Cadillo-Quiroz H, Garcia-Pichel F, et al. 2015.** Exometabolite niche partitioning

- 574 among sympatric soil bacteria. *Nature communications* **6**: 1–9.
- 575 **Bates TR, Lynch JP. 1996.** Stimulation of root hair elongation in *Arabidopsis thaliana* by low  
576 phosphorus availability. *Plant, cell & environment* **19**: 529–538.
- 577 **Bowen BP, Northen TR. 2010.** Dealing with the Unknown: Metabolomics and Metabolite  
578 Atlases. *JAM* **21**: 1471–1476.
- 579 **Brutnell TP, Bennetzen JL, Vogel JP. 2015.** *Brachypodium distachyon* and *Setaria viridis*: Model  
580 Genetic Systems for the Grasses. *Annu Rev Plant Biol* **66**: 465–485.
- 581 **Brychkova G, Fluhr R, Sagi M. 2008.** Formation of xanthine and the use of purine metabolites  
582 as a nitrogen source in *Arabidopsis* plants. *Plant Signaling & Behavior* **3**: 999–1001.
- 583 **Bulgarelli D, Schlaeppi K, Spaepen S, van Themaat EVL, Schulze-Lefert P. 2013.** Structure  
584 and Functions of the Bacterial Microbiota of Plants. *Annu Rev Plant Biol* **64**: 807–838.
- 585 **Cai J, Chen L, Qu H, Lian J, Liu W, Hu Y, Xu G. 2011.** Alteration of nutrient allocation and  
586 transporter genes expression in rice under N, P, K, and Mg deficiencies. *Acta Physiologiae*  
587 *Plantarum* **34**: 939–946.
- 588 **Carvalhais LC, Dennis PG, Fedoseyenko D, Hajirezaei M-R, Borriss R, Wiren von N. 2011.**  
589 Root exudation of sugars, amino acids, and organic acids by maize as affected by nitrogen,  
590 phosphorus, potassium, and iron deficiency. *Journal of Plant Nutrition and Soil Science-Zeitschrift*  
591 *Fur Pflanzenernahrung Und Bodenkunde* **174**: 3–11.
- 592 **Castrillo G, Teixeira PJPL, Paredes SH, Law TF, de Lorenzo L, Feltcher ME, Finkel OM,**  
593 **Breakfield NW, Mieczkowski P, Jones CD, et al. 2017.** Root microbiota drive direct integration  
594 of phosphate stress and immunity. *Nature* **543**: 1–22.
- 595 **Chaparro JM, Badri DV, Bakker MG, Sugiyama A, Manter DK, Vivanco JM. 2013.** Root  
596 Exudation of Phytochemicals in *Arabidopsis* Follows Specific Patterns That Are Developmentally  
597 Programmed and Correlate with Soil Microbial Functions (KWu, Ed.). *PLoS One* **8**: 1–10.
- 598 **Cordell D, Drangert J-O, White S. 2009.** The story of phosphorus: Global food security and food  
599 for thought. *Global Environmental Change* **19**: 292–305.
- 600 **Djombou Feunang Y, Eisner R, Knox C, Chepelev L, Hastings J, Owen G, Fahy E, Steinbeck**  
601 **C, Subramanian S, Bolton E, et al. 2016.** ClassyFire: automated chemical classification with a  
602 comprehensive, computable taxonomy. *Journal of cheminformatics* **8**: 61–20.
- 603 **Edwards J, Johnson C, Santos-Medellín C, Lurie E, Podishetty NK, Bhatnagar S, Eisen JA,**  
604 **Sundaresan V. 2015.** Structure, variation, and assembly of the root-associated microbiomes of  
605 rice. *Proceedings of the National Academy of Sciences* **112**: E911–E920.
- 606 **Edwards JA, Santos-Medellín CM, Liechty ZS, Nguyen B, Lurie E, Eason S, Phillips G,**  
607 **Sundaresan V. 2018.** Compositional shifts in root-associated bacterial and archaeal microbiota

- 608 track the plant life cycle in field-grown rice (J Gore, Ed.). *PLOS Biology* **16**: e2003862–28.
- 609 **Etalo DW, Jeon J-S, Raaijmakers JM. 2018.** Modulation of plant chemistry by beneficial root  
610 microbiota. *Natural Product Reports* **00**: 1–12.
- 611 **FAO.** World food situation. <http://www.fao.org/worldfoodsituation/en/>.
- 612 **Gao J, Sasse J, Lewald KM, Zhainina K, Cornmesser LT, Duncombe TA, Yoshikuni Y, Vogel**  
613 **JP, Firestone MK, Northen TR. 2018.** Ecosystem Fabrication (EcoFAB) Protocols for The  
614 Construction of Laboratory Ecosystems Designed to Study Plant-microbe Interactions. *Journal of*  
615 *visualized experiments : JoVE* **2018**.
- 616 **Helliwell JR, Sturrock CJ, Mairhofer S, Craigon J, Ashton RW, Miller AJ, Whalley WR,**  
617 **Mooney SJ. 2017.** The emergent rhizosphere: imaging the development of the porous  
618 architecture at the root-soil interface. *Nature Publishing Group* **7**: 14875.
- 619 **Holz M, Zarebanadkouki M, Kuzyakov Y, Pausch J, Carminati A. 2017.** Root hairs increase  
620 rhizosphere extension and carbon input to soil. *Ann Bot (Lond)* **29**: 692–9.
- 621 **Hsia MM, O'Malley R, Cartwright A, Nieu R, Gordon SP, Kelly S, Williams TG, Wood DF, Zhao**  
622 **Y, Bragg J, et al. 2017.** Sequencing and functional validation of the JGI Brachypodium  
623 distachyonT-DNA collection. *Plant J* **91**: 361–370.
- 624 **Iannucci A, Fragasso M, Beleggia R, Nigro F, Papa R. 2017.** Evolution of the Crop Rhizosphere:  
625 Impact of Domestication on Root Exudates in Tetraploid Wheat (*Triticum turgidum* L.). *Frontiers*  
626 *in Plant Science* **8**: 666–10.
- 627 **Jiang H, Xu Z, Aluru MR, Dong L. 2014.** Plant chip for high-throughput phenotyping of  
628 *Arabidopsis*. *Lab Chip* **14**: 1281–1293.
- 629 **Jones DL, Darrah PR. 1993.** Re-Sorption of Organic-Compounds by Roots of Zea-Mays L and Its  
630 Consequences in the Rhizosphere .2. Experimental and Model Evidence for Simultaneous  
631 Exudation and Re-Sorption of Soluble C Compounds. *Plant and Soil* **153**: 47–59.
- 632 **Jones DL, Darrah PR. 1994.** Amino-Acid Influx at the Soil-Root Interface of Zea-Mays L and Its  
633 Implications in the Rhizosphere. *Plant and Soil* **163**: 1–12.
- 634 **Jones DL, Darrah PR. 1995.** Influx and Efflux of Organic-Acids Across the Soil-Root Interface of  
635 Zea-Mays L and Its Implications in Rhizosphere C Flow. *Plant and Soil* **173**: 103–109.
- 636 **Koebnick N, Daly KR, Keyes SD, George TS, Brown LK, Raffan A, Cooper LJ, Naveed M,**  
637 **Bengough AG, Sinclair I, et al. 2017.** High-resolution synchrotron imaging shows that root  
638 hairs influence rhizosphere soil structure formation. *New Phytol* **374**: 739–12.
- 639 **Lobet G, Pagès L, Draye X. 2011.** A Novel Image-Analysis Toolbox Enabling Quantitative  
640 Analysis of Root System Architecture. *PLANT PHYSIOLOGY* **157**: 29–39.
- 641 **López-Bucio J, Campos-Cuevas JC, Hernández-Calderón E, Velásquez-Becerra C, Farías-**

- 642 **Rodríguez R, Macías-Rodríguez LI, Valencia-Cantero E. 2007.** Bacillus megaterium  
643 rhizobacteria promote growth and alter root-system architecture through an auxin- and  
644 ethylene-independent signaling mechanism in Arabidopsis thaliana. *Molecular Plant-Microbe*  
645 *Interactions* **20**: 207–217.
- 646 **Massonnet C, Vile D, Fabre J, Hannah MA, Caldana C, Lisec J, Beemster GTS, Meyer RC,**  
647 **Messerli G, Gronlund JT, et al. 2010.** Probing the Reproducibility of Leaf Growth and Molecular  
648 Phenotypes: A Comparison of Three Arabidopsis Accessions Cultivated in Ten Laboratories.  
649 *PLANT PHYSIOLOGY* **152**: 2142–2157.
- 650 **Metzner R, Eggert A, van Dusschoten D, Pflugfelder D, Gerth S, Schurr U, Uhlmann N,**  
651 **Jahnke S. 2015.** Direct comparison of MRI and X-ray CT technologies for 3D imaging of root  
652 systems in soil: potential and challenges for root trait quantification. *Plant Methods* **11**: 17–11.
- 653 **Nestler J, Keyes SD, Wissuwa M. 2016.** Root hair formation in rice ( *Oryza sativa*L.) differs  
654 between root types and is altered in artificial growth conditions. *Journal of Experimental Botany*  
655 **67**: 3699–3708.
- 656 **Neumann G, Martinoia E. 2002.** Cluster roots--an underground adaptation for survival in  
657 extreme environments. *Trends in Plant Science* **7**: 162–167.
- 658 **Ortiz-Castro R, Diaz-Perez C, Martinez-Trujillo M, del Rio RE, Campos-Garcia J, López-**  
659 **Bucio J. 2011.** Transkingdom signaling based on bacterial cyclodipeptides with auxin activity in  
660 plants. *Proceedings of the National Academy of Sciences* **108**: 7253–7258.
- 661 **Parashar A, Pandey S. 2011.** Plant-in-chip: Microfluidic system for studying root growth and  
662 pathogenic interactions in Arabidopsis. *Applied Physics Letters* **98**: 263703–4.
- 663 **Peret B, Clément M, Nussaume L, Desnos T. 2011.** Root developmental adaptation to  
664 phosphate starvation: better safe than sorry. *Trends in Plant Science* **16**: 442–450.
- 665 **Pétriacq P, Williams A, Cotton A, McFarlane AE, Rolfe SA, Ton J. 2017.** Metabolite profiling of  
666 non-sterile rhizosphere soil. *Plant J* **92**: 147–162.
- 667 **Plaxton WC, Tran HT. 2011.** Metabolic Adaptations of Phosphate-Starved Plants. *PLANT*  
668 *PHYSIOLOGY* **156**: 1006–1015.
- 669 **Poorter H, Fiorani F, Stitt M, Schurr U, Finck A, Gibon Y, Usadel B, Munns R, Atkin OK,**  
670 **Tardieu F, et al. 2012.** The art of growing plants for experimental purposes: a practical guide  
671 for the plant biologist. *Functional Plant Biology* **39**: 821–18.
- 672 **Rellán-Álvarez R, Lobet G, Lindner H, Pradier P-L, Sebastian J, Yee M-C, Geng Y, Trontin C,**  
673 **LaRue T, Schragger-Lavelle A, et al. 2015.** GLO-Roots: an imaging platform enabling  
674 multidimensional characterization of soil-grown root systems. *eLife* **4**: 393.
- 675 **Sasse J, Martinoia E, Northen T. 2018.** Feed Your Friends: Do Plant Exudates Shape the Root  
676 Microbiome? *Trends Plant Sci* **23**: 25–41.

- 677 **Senga R-A, Alegria Terrazas S, Balbirnie K, Blank M, Janiak A, Szarejko I, Chmielewska B,**  
678 **Karcz J, Morris J, Hedley PE, et al. 2017.** Root Hair Mutations Displace the Barley Rhizosphere  
679 Microbiota. *Frontiers in Plant Science* **8**: 2006–15.
- 680 **Smirnoff N. 2018.** Ascorbic acid metabolism and functions\_ A comparison of plants and  
681 mammals. *Free Radical Biology and Medicine* **122**: 116–129.
- 682 **Stanley CE, Shrivastava J, Brugman R, Heinzelmann E, van Swaay D, Grossmann G. 2017.**  
683 Dual-flow-RootChip reveals local adaptations of roots towards environmental asymmetry at the  
684 physiological and genetic levels. *New Phytol* **217**: 1357–1369.
- 685 **Strobbe S, Van Der Straeten D. 2017.** Folate biofortification in food crops. *Current Opinion in*  
686 *Biotechnology* **44**: 202–211.
- 687 **Strobel BW. 2001.** Influence of vegetation on low-molecular-weight carboxylic acids in soil  
688 solution - a review. *Geoderma* **99**: 169–198.
- 689 **Sumner LW, Amberg A, Barrett D, Beale MH, Beger R, Daykin CA, Fan TWM, Fiehn O,**  
690 **Goodacre R, Griffin JL, et al. 2007.** Proposed minimum reporting standards for chemical  
691 analysis. *Metabolomics* **3**: 211–221.
- 692 **Swenson TL, Jenkins S, Bowen BP, Northen TR. 2015.** Untargeted soil metabolomics methods  
693 for analysis of extractable organic matter. *Soil Biology & Biochemistry* **80**: 189–198.
- 694 **Thijs S, Sillen W, Rineau F, Weyens N, Vangronsveld J. 2016.** Towards an Enhanced  
695 Understanding of Plant–Microbiome Interactions to Improve Phytoremediation: Engineering the  
696 Metaorganism. *frontiers in Microbiology* **7**: 416–15.
- 697 **<http://www.fao.org/worldfoodsituation/en>. <http://www.fao.org/worldfoodsituation/en>.**
- 698 **Vacheron J, Desbrosses G, Bouffaud M-L, Touraine B, Moëne-Loccoz Y, Muller D, Legendre**  
699 **L, Wisniewski-Dyé F, Prigent-Combaret C. 2013.** Plant growth-promoting rhizobacteria and  
700 root system functioning. *Frontiers in Plant Science* **4**: 356.
- 701 **Venturi V, Keel C. 2016.** Signaling in the Rhizosphere. *Trends Plant Sci* **21**: 187–198.
- 702 **Verbon EH, Liberman LM. 2016.** Beneficial Microbes Affect Endogenous Mechanisms  
703 Controlling Root Development. *Trends in Plant Science* **21**: 218–229.
- 704 **Vogel J, Hill T. 2007.** High-efficiency Agrobacterium-mediated transformation of *Brachypodium*  
705 *distachyon* inbred line Bd21-3. *Plant Cell Reports* **27**: 471–478.
- 706 **Watt M, Schneebeli K, Dong P, Wilson IW. 2009.** The shoot and root growth of *Brachypodium*  
707 and its potential as a model for wheat and other cereal crops. *Functional Plant Biology* **36**: 960–  
708 10.
- 709 **Yamada K, Kanai M, Osakabe Y, Ohiraki H, Shinozaki K, Yamaguchi-Shinozaki K. 2011.**  
710 Monosaccharide absorption activity of *Arabidopsis* roots depends on expression profiles of



711 transporter genes under high salinity conditions. *Journal of Biological Chemistry* **286**: 43577–  
712 43586.

713 **Yao Y, Sun T, Wang T, Ruebel O, Northen T, Bowen B. 2015.** Analysis of Metabolomics  
714 Datasets with High-Performance Computing and Metabolite Atlases. *Metabolites* **5**: 431–442.

715 **Zamioudis C, Mastranesti P, Dhonukshe P, Blilou I, Pieterse CMJ. 2013.** Unraveling Root  
716 Developmental Programs Initiated by Beneficial *Pseudomonas* spp. Bacteria. *PLANT*  
717 *PHYSIOLOGY* **162**: 304–318.

718 **Zhalnina K, Louie KB, Hao Z, Mansoori N, Da Rocha UN, Shi S, Cho H, Karaoz U, Loqué D,**  
719 **Bowen BP, et al. 2018.** Dynamic root exudate chemistry and microbial substrate preferences  
720 drive patterns in rhizosphere microbial community assembly. *Nature Microbiology* **3**: 470–480.

721 **Zhang C, Simpson RJ, Kim CM, Warthmann N, Delhaize E, Dolan L, Byrne ME, Wu Y, Ryan**  
722 **PR. 2018.** Do longer root hairs improve phosphorus uptake? Testing the hypothesis with  
723 transgenic *Brachypodium distachyon* lines overexpressing endogenous RSL genes. *New Phytol*  
724 **217**: 1654–1666.

725

## 726 **Figure legends**

### 727 **Fig. 1 Experimental setup of the reproducibility experiment**

728 Illustration of the reproducibility experiment: EcoFABs, *B. distachyon* seeds, growth  
729 media (0.5x MS: yellow, 0.5x MS-P: red, soil extract: blue), and light/temperature sensors were  
730 distributed to the participating laboratories. Each laboratory germinated the seeds, transferred  
731 seedlings to sterilized EcoFABs, and grew the plants for 21 days. Root and shoot tissue as well as  
732 root exudates were sampled for downstream analysis.

733

### 734 **Fig. 2 Inter-laboratory morphological and metabolic consistency**

735 *B. distachyon* was grown in 0.5x MS (MS, yellow), 0.5x MS-P (MS-P, red), or soil extract  
736 (SE, blue) for three weeks. Root and shoot fresh weight (a) and phosphate content (b) were  
737 determined by the participating laboratories. Data are means  $\pm$  s.e.m. ( $N > 9$ ). Asterisks indicate  
738 significant differences between experimental treatments (Anova,  $p < 0.05$ ). Principal component  
739 analysis of normalized peak heights of ground root tissue metabolites (c) and root exudate  
740 metabolites (d). Hierarchical clustering for the metabolite data is shown in Fig. S3. PC, principal  
741 component.

742

### 743 **Fig. 3 Root morphology**

744 (a) Representative pictures of 14 dat (days after transfer) *B. distachyon* in EcoFAB  
745 chambers in 0.5x MS (MS), 0.5x MS-P (MS-P), or soil extract (SE) for the different laboratories  
746 (Lab1-4). Note the long root hairs in soil-extract growing plants (arrowheads). Brightness and  
747 contrast were adjusted for better display. Scale bar: 1 cm. (b) Total root length 7, 14, and 21 dat  
748 averaged across laboratories. The same data is displayed per lab in Fig. S4. Data are means  $\pm$   
749 s.e.m. ( $N > 9$ ). (c) Root hair morphology. Arrowheads point to root hairs. Scale bar = 1 mm. (d)  
750 Root hair length at 21 dat for primary and lateral roots. Data are means  $\pm$  s.e.m. ( $N > 9$ ). Asterisks  
751 indicate significant differences within a group of bars (Anova,  $p < 0.05$ ).

752

### 753 **Fig. 4 Characteristic metabolites detected in different root tissues**

754 Normalized relative peak height of metabolites differing between roots grown in 0.5x MS  
755 (MS, yellow), 0.5x MS -P (MS-P, red), and soil extract (SE, blue) (Anova,  $p < 0.05$ ). Metabolite  
756 cluster are indicated by roman numerals.

757

758 **Fig. 5 Metabolites reduced in exudates of soil extract grown plants**

759 Fold change of selected metabolites differing between exudates of plants grown in soil  
760 extract, and soil extract controls (Anova,  $p < 0.05$ ). Graphs for single laboratories are given in Fig.  
761 S7.

762

## 763 Supporting information

764

765 **Fig. S1** Root morphology and exudate analysis capabilities of EcoFABs

766 **Fig. S2** Root:shoot ratio of EcoFAB-grown *B. distachyon*

767 **Fig. S3** Hierarchical clustering of root tissue and exudate metabolites

768 **Fig. S4** Total root length by laboratory

769 **Fig. S5** Characteristic metabolites detected in exudates

770 **Fig. S6** Principal component analysis of soil extract exudate metabolites versus control

771 **Fig. S7** Metabolites reduced in exudates of soil extract grown plants by laboratory

772

773 **Table S1** Participating laboratories and documented growth conditions for the  
774 reproducibility experiment

775

776

777 Excel files:

778 **Table S2** Root tissue metabolite data

779 **Table S3** Root exudate metabolite data

780

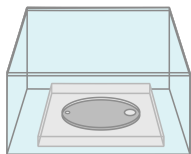

EcoFABs

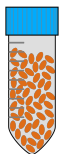

Seeds

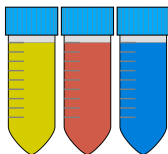

Media

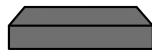

Sensor

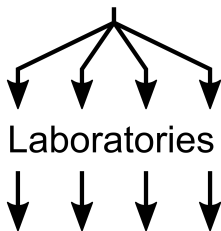

4 Laboratories

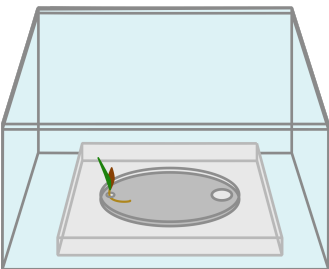

3 Weeks  
Growth

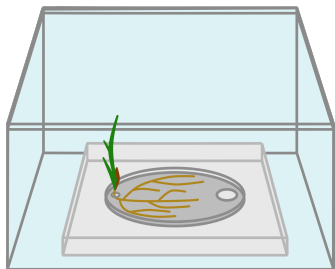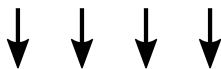

Sampling

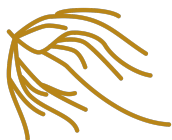

Roots

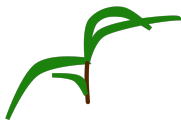

Shoots

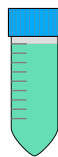

Exudates

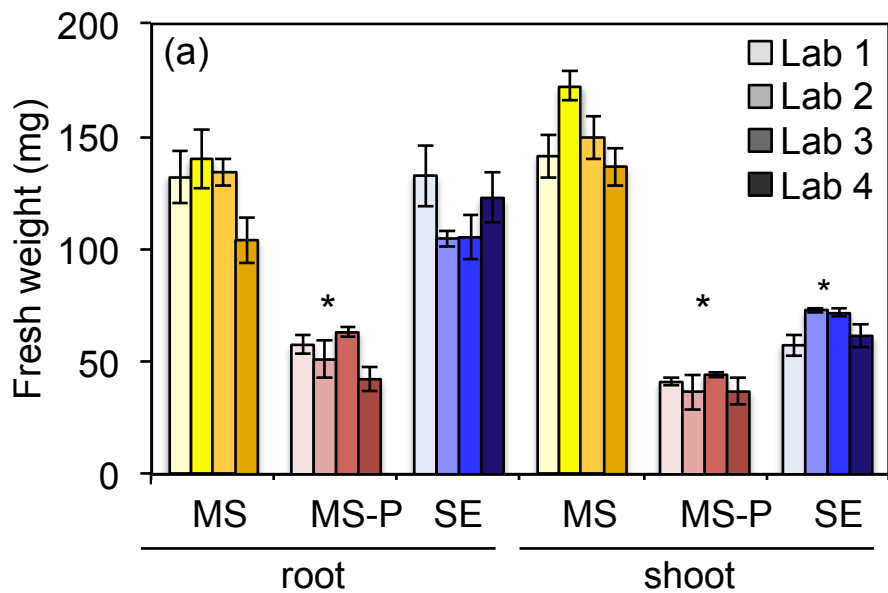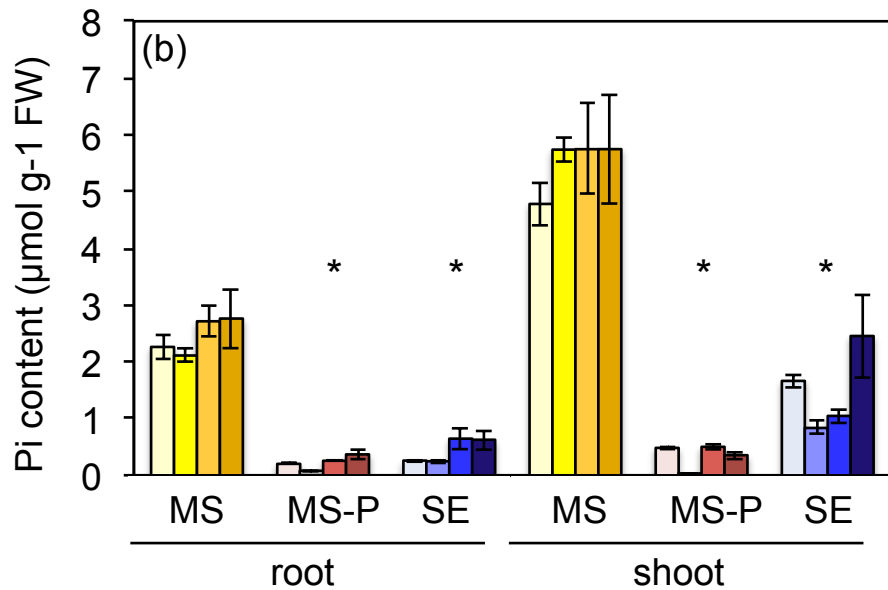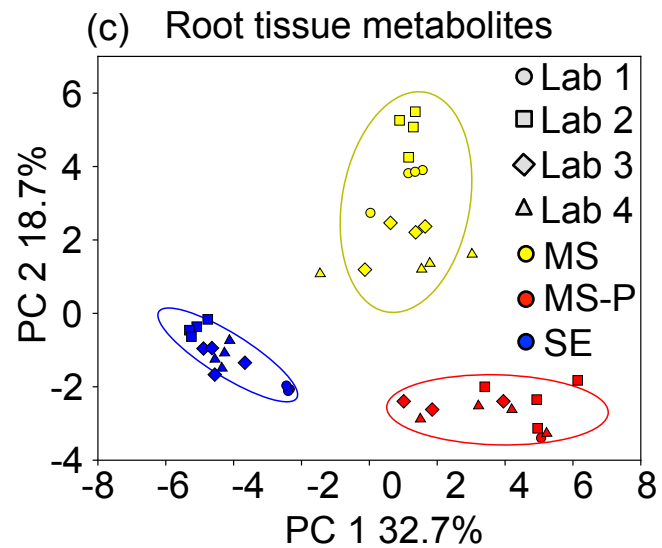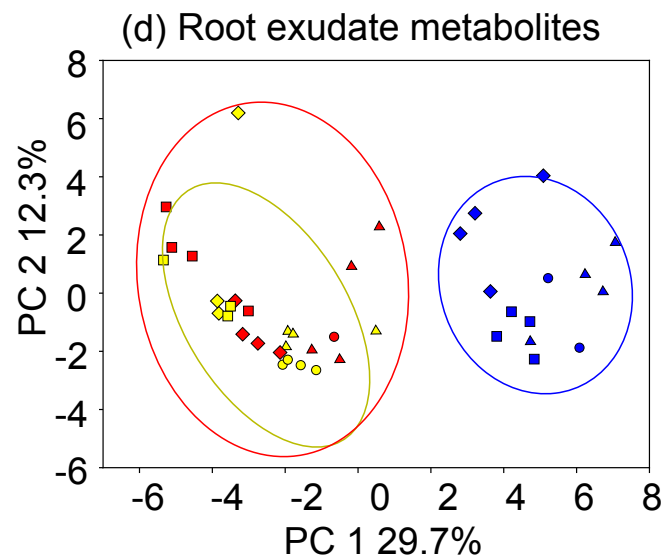

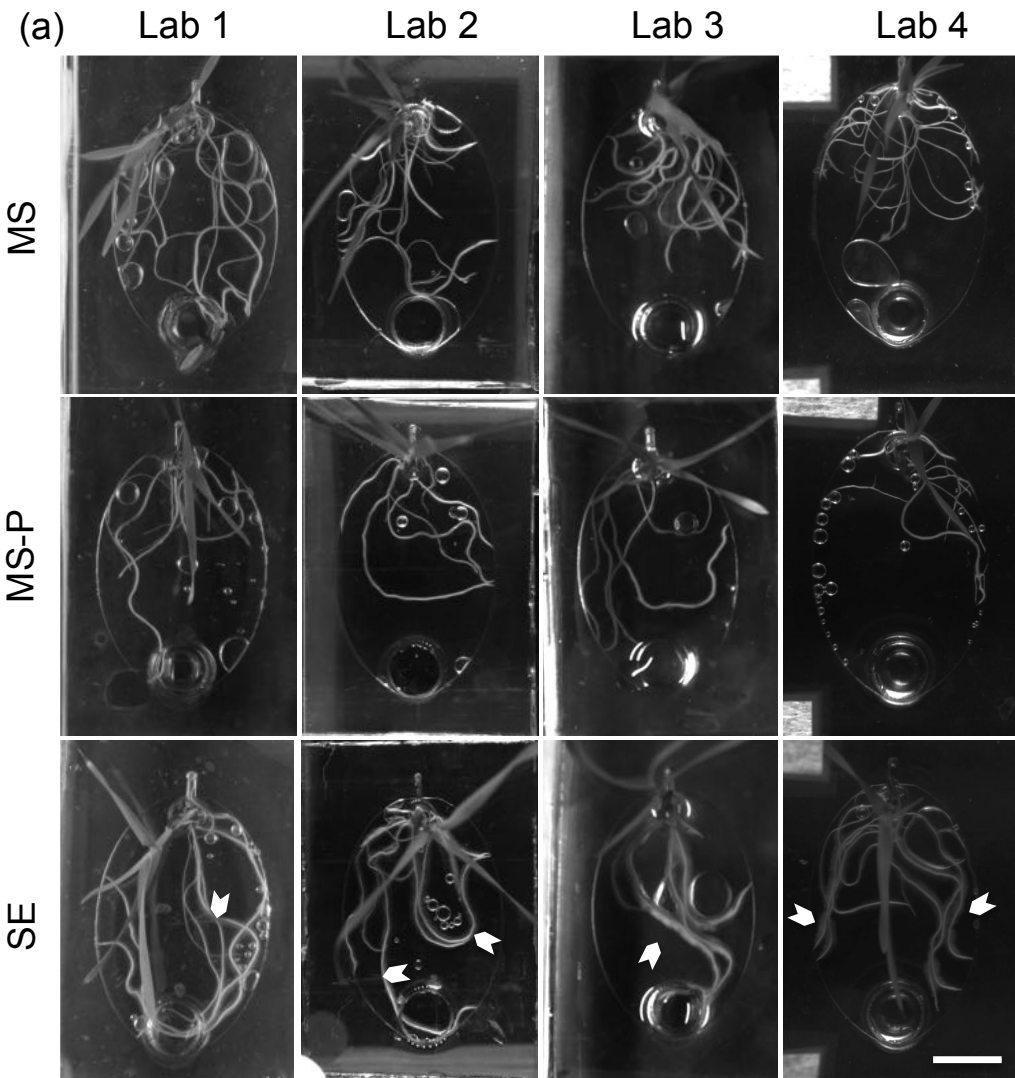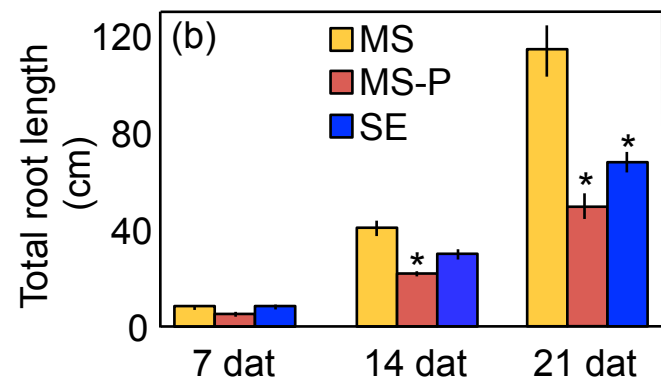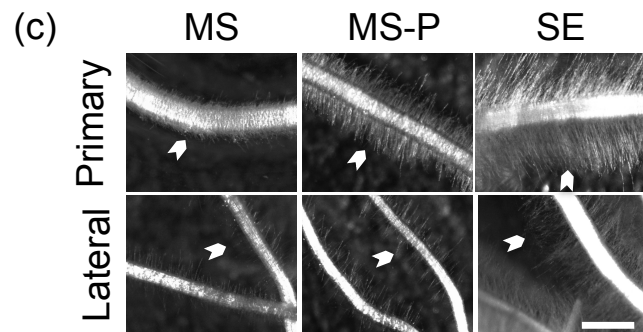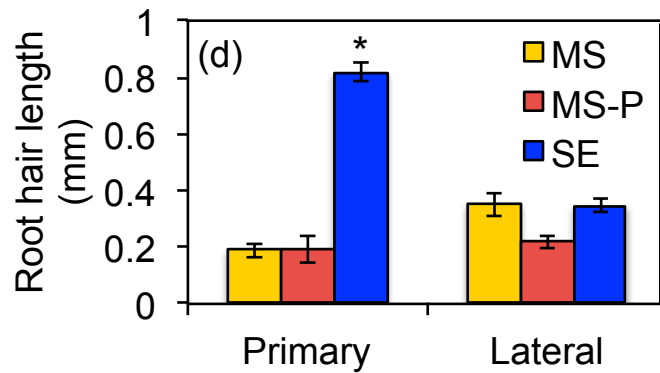

0% 10% 20% 30% 40% 50% 60% 70% 80% 90% 100%

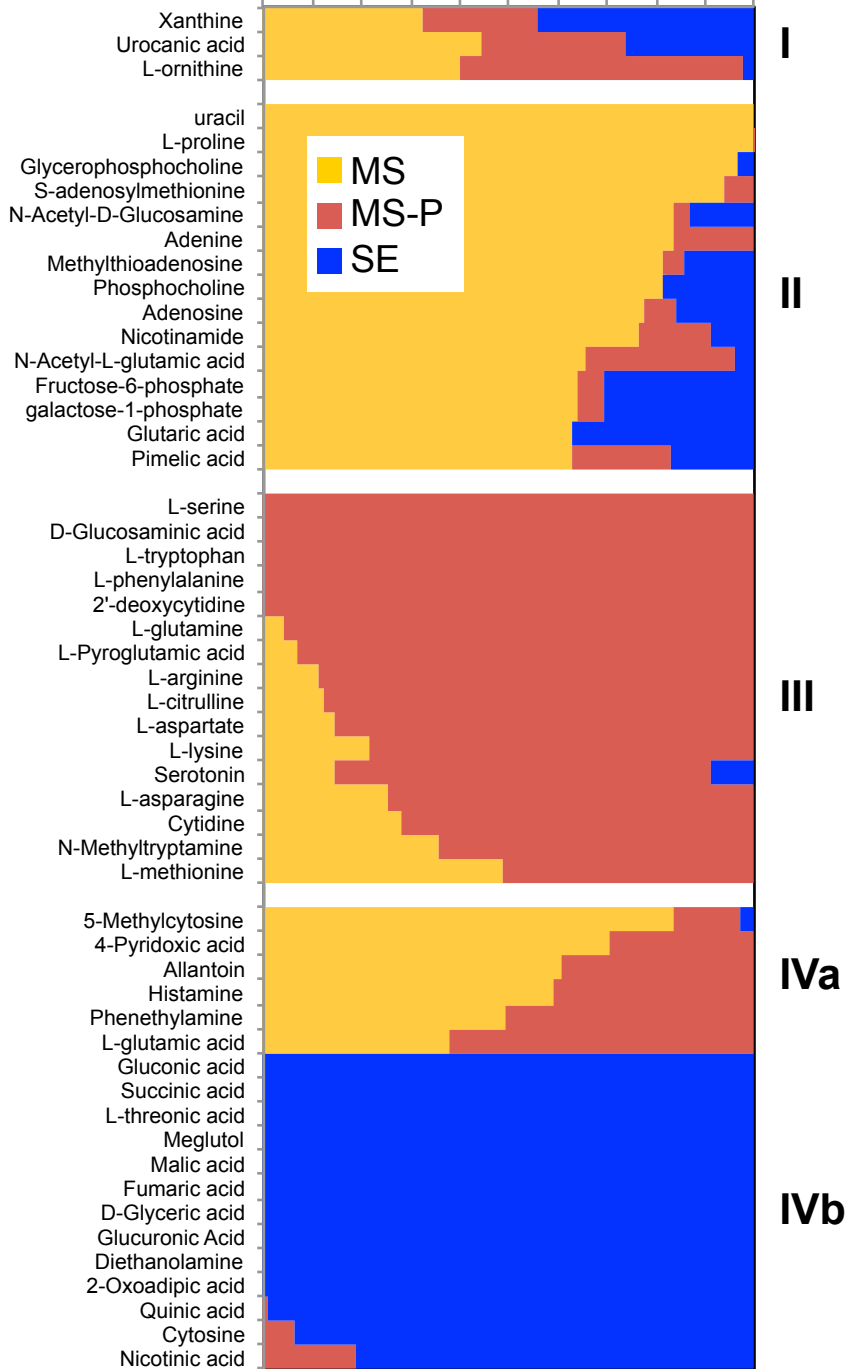



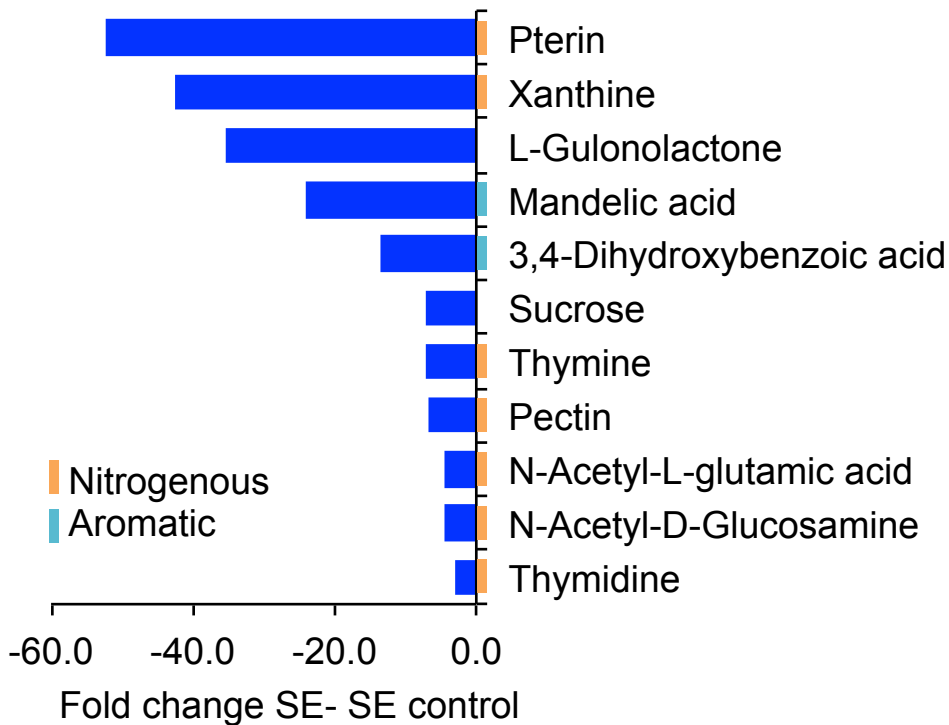

Source: https://www.biorxiv.org/content/biorxiv/early/2018/10/05/435818.full.pdf
